# Supplementary material for: Healthcare Providers’ Knowledge and Attitude Towards Abortions in Thailand: A Pre-Post Evaluation of Trainings on Safe Abortion
Source: PubMed Central journal article supplement (PMC7246465; doi:10.3390/ijerph17093198), 2020-05-04
Supplement: ijerph-17-03198-s001.pdf [file ijerph-17-03198-s001.pdf]

### Supplementary Material

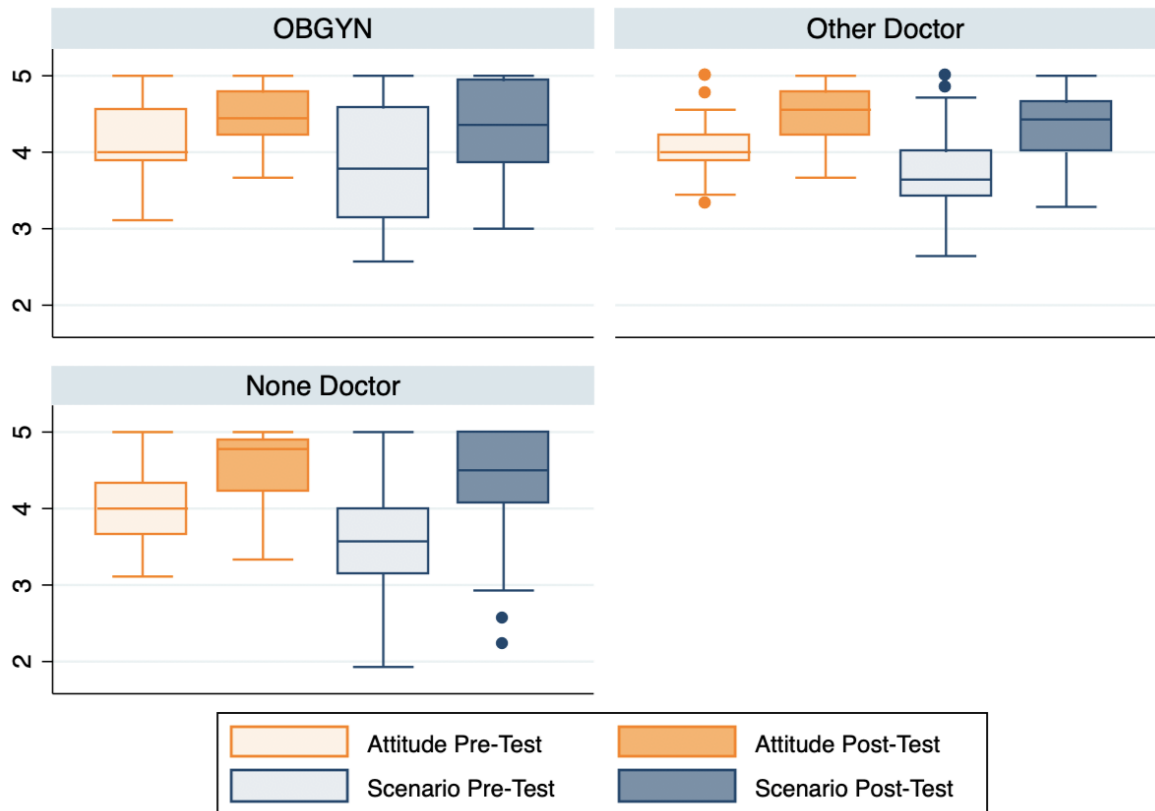

**Figure S1.** Box Plot of the Average Pre-test and Post-test Response by career type.

**Table S1.** Regularized least squares analysis on towards adolescents and women unplanned for pregnancy, and unsafe abortions.

| (Reference: OBGYN)            | Coef. (95% CI)         | <i>p</i> -Value |
|-------------------------------|------------------------|-----------------|
| Non-OBGYN doctor              | 0.0183 (-.042, .125)   | 0.710           |
| Non-Doctor                    | 0.0953 (0.056, 0.147)  | 0.070           |
| Prior knowledge of regulation | -0.060 (-0.074,-0.050) | 0.291           |
| Experience in treating        | -0.064 (-0.122,-0.005) | 0.335           |
| Experience in counselling     | 0.000 (0.000, 0.001)   | 0.617           |

**Table S2.** Regularized least squares analysis on abortion scenarios.

| (Reference: OBGYN)                   | Coef. (95% CI)         | <i>p</i> -Value |
|--------------------------------------|------------------------|-----------------|
| <b>Non-OBGYN doctor</b>              | -0.056 (-0.078,-0.013) | 0.314           |
| <b>Non-Doctor</b>                    | 0.162 (0.122, 0.221)   | 0.006           |
| <b>Prior knowledge of regulation</b> | 0.005 (-0.033, 0.037)  | 0.938           |
| <b>Experience in counselling</b>     | 0.000 (0.000, 0.001)   | 0.428           |
